# Supplementary material for: The German Gestational Diabetes Study (PREG): Rationale, Methodology and Design
Source: bioRxiv or medRxiv preprint supplement (doi:10.1101/2021.10.10.21264499), 2021-10-11
Supplement: Supplementary file [file media-1.pdf]

Table 1 Study sites PREG study

| Site                                                                                                                                               | Examinations                                                                                                                                                                                                                                                                                                                                                                                                             |
|----------------------------------------------------------------------------------------------------------------------------------------------------|--------------------------------------------------------------------------------------------------------------------------------------------------------------------------------------------------------------------------------------------------------------------------------------------------------------------------------------------------------------------------------------------------------------------------|
| <p><b>Tübingen</b><br/>           Institute for Diabetes Research and Metabolic Diseases (IDM) at the Eberhard Karls University Tübingen</p>       | <p><b>Pregnancy:</b><br/>           OGTT, liver sonography<br/> <b>Delivery:</b><br/>           Birth outcome, cord blood, placenta<br/> <b>Follow up mothers:</b><br/>           OGTT, spiroergometry, whole body MRI, MRS<br/> <b>Follow up offspring:</b><br/>           Developmental tests, intelligence test, heart rate variability, fasted blood, urine, whole body MRI, MRS, continuous glucose measurement</p> |
| <p><b>Düsseldorf</b><br/>           German Diabetes Center (DDZ), Leibniz Center for Diabetes Research at Heinrich Heine University Düsseldorf</p> | <p><b>Pregnancy:</b><br/>           OGTT<br/> <b>Delivery:</b><br/>           Birth outcome<br/> <b>Follow up mothers:</b><br/>           OGTT, spiroergometry, whole body MRI, MRS</p>                                                                                                                                                                                                                                  |
| <p><b>Leipzig</b><br/>           University of Leipzig Medical Center, IFB Adiposity Diseases, University of Leipzig,</p>                          | <p><b>Pregnancy:</b><br/>           OGTT<br/> <b>Delivery:</b><br/>           Birth outcome<br/> <b>Follow up mothers:</b><br/>           OGTT, spiroergometry, whole body MRI, MRS</p>                                                                                                                                                                                                                                  |
| <p><b>Dresden</b><br/>           Department of Medicine, University of Dresden</p>                                                                 | <p><b>Pregnancy:</b><br/>           OGTT<br/> <b>Delivery:</b><br/>           Birth outcome<br/> <b>Follow up mothers:</b><br/>           OGTT, spiroergometry, abdominal MRI</p>                                                                                                                                                                                                                                        |

Table 2 LOINC codes for routinely measured analytes

| System       | Analyte                                                      | Logical Observation Identifiers Names and Codes (LOINC) | Assessed in Mother (M) Child (C) |
|--------------|--------------------------------------------------------------|---------------------------------------------------------|----------------------------------|
| Serum/Plasma | Glucose                                                      | 2345-7                                                  | M/C                              |
|              | Insulin                                                      | 25447-4                                                 | M/C                              |
|              | C-peptide                                                    | 14633-2                                                 | M/C                              |
|              | Proinsulin                                                   | 27882-0                                                 | M/C                              |
|              | Non-esterified fatty acids                                   | 1769-9                                                  | M/C                              |
|              | Leukocytes                                                   | 60026-2                                                 | M/C                              |
|              | Thrombocytes                                                 | 777-3                                                   | M/C                              |
|              | Erythrocytes                                                 | 789-8                                                   | M/C                              |
|              | Hematocrit                                                   | 4544-3                                                  | M/C                              |
|              | Hemoglobin                                                   | 718-7                                                   | M/C                              |
|              | Erythrocyte mean corpuscular hemoglobin (HBE)                | 785-6                                                   | M/C                              |
|              | Erythrocyte mean corpuscular hemoglobin concentration (MCHC) | 786-4                                                   | M/C                              |
|              | Erythrocyte mean corpuscular volume (MCV)                    | 787-2                                                   | M/C                              |
|              | Albumin                                                      | 61152-5                                                 | M                                |
|              | Total protein                                                | 2885-2                                                  | M                                |
|              | Triglycerides                                                | 2571-8                                                  | M/C                              |
|              | Cholesterol                                                  | 2093-3                                                  | M/C                              |
|              | High density lipoprotein cholesterol (HDL-C)                 | 2085-9                                                  | M/C                              |
|              | Low density lipoprotein cholesterol (LDL-C)                  | 2089-1                                                  | M/C                              |
|              | Uric acid                                                    | 3084-1                                                  | M                                |
|              | Urea                                                         | 3091-6                                                  | M                                |
|              | Creatinine                                                   | 2160-0                                                  | M                                |
|              | Lipoprotein (a)                                              | 10835-7                                                 | M                                |
|              | Apolipoprotein A-I                                           | 1869-7                                                  | M                                |
|              | Apolipoprotein B                                             | 1884-6                                                  | M                                |
|              | Homocysteine                                                 | 13965-9                                                 | M                                |
|              | Aspartate aminotransferase                                   | 1920-8                                                  | M                                |
|              | Gamma glutamyl transferase                                   | 2324-2                                                  | M                                |
|              | Alanine aminotransferase                                     | 1742-6                                                  | M                                |
|              | HbA1c                                                        | 17856-6                                                 | M/C                              |
|              | Glutamate decarboxylase 65 Ab (GAD-AB)                       | 56540-8                                                 | M                                |
|              | Potassium                                                    | 2823-3                                                  | M                                |
|              | Sodium                                                       | 2951-2                                                  | M                                |
|              | Calcium                                                      | 2000-8                                                  | M                                |
| Chloride     | 2075-0                                                       | M                                                       |                                  |
| Phosphate    | 14879-1                                                      | M                                                       |                                  |
| Magnesium    | 2601-3                                                       | M                                                       |                                  |

| System | Analyte                                               | Logical Observation Identifiers Names and Codes (LOINC) | Assessed in Mother (M) Child (C) |
|--------|-------------------------------------------------------|---------------------------------------------------------|----------------------------------|
|        | Iron                                                  | 2498-4                                                  | M                                |
|        | Transferrin                                           | 3034-6                                                  | M                                |
|        | C reactive protein (CRP)                              | 1988-5                                                  | M/C                              |
|        | Interleukin-6 (IL-6)                                  | 26881-3                                                 | M                                |
|        | Thyrotropin (TSH)                                     | 3016-3                                                  | M                                |
|        | Cortisol                                              | 14675-3                                                 | M                                |
|        | $\beta$ -human chorionic gonadotropin ( $\beta$ -HCG) | 19180-9                                                 | M                                |
|        | Prolactin                                             | 2842-3                                                  | M                                |
|        | Estradiol                                             | 14715-7                                                 | M                                |
|        | Progesterone                                          | 14890-8                                                 | M                                |
|        | Testosterone                                          | 14913-8                                                 | M                                |
|        | Sex hormone binding protein (SHBG)                    | 13967-5                                                 | M                                |
| Urine  | Albumin                                               | 1754-1                                                  | M/C                              |
|        | Creatinine                                            | 2161-8                                                  | M/C                              |
|        | Urea                                                  | 3092-4                                                  | M/C                              |
|        | Total protein                                         | 2888-6                                                  | M/C                              |
|        | Leukocytes                                            | 33052-2                                                 | M/C                              |
|        | Nitrit                                                | 50558-6                                                 | M/C                              |
|        | pH                                                    | 50560-2                                                 | M/C                              |

Table 3 Grading of hepatic steatosis

| Grade | Echogenicity | Sound attenuation | Vessels  |
|-------|--------------|-------------------|----------|
| I     | +            | -                 | Normal   |
| II    | ++           | (+)               | Normal   |
| III   | +++          | +                 | Rarified |
