# Supplementary material for: The German Gestational Diabetes Study (PREG): Rationale, Methodology and Design
Source: bioRxiv or medRxiv preprint supplement (doi:10.1101/2021.10.10.21264499), 2021-10-11
Supplement: Supplementary file [file media-2.pdf]

## Questionnaire: Breastfeeding and Infant nutrition

Please **ONLY** answer the questions for the infant included with you in the study.

My Child was born on: \_\_\_\_ . \_\_\_\_ . \_\_\_\_\_ (dd/mm/yy)

---

### 1. How did you feed your child before you implemented the supplementary diet?

Before I implemented the supplementary diet I

- breastfed exclusively (only breast milk) → *continue with question 3*
- breastfed partially (breast milk + infant formula)
- did not breastfeed..... → *continue with question 4*
- breastfed for a very short period (< 1 week) ..... → *continue with question 5*
- am still breastfeeding

### 2. If you used to breastfeed partially after delivery, which of the following statements describes the ratio between breast milk and baby milk best?

- I mainly breastfed (approx. 75% breast milk and 25% infant formula)
- I equally fed breast milk and infant formula (approx. 50% breast milk and 50% infant formula)
- I mainly fed infant formula (approx. 25% breast milk and 75% infant formula)

**3. For how long have you been breastfeeding your infant in total?** (Please also consider the months you have been breastfeeding partially, e.g. during the start of supplementary diet)

- I have been breastfeeding my infant for   months in total
- During this time, I have been breastfeeding

months exclusively (only breast milk)

months partially (breast milk + infant formula / supplementary food))

**→ If you used to breastfeed exclusively or partially please continue with question 6**

**Please answer the next question only if you did not breastfeed your infant at all**

**4. What was the reason why you chose not to breastfeed your infant?** (multiple answers possible)

- I did not want to
- I was sick and / or had to take medication
- My baby had health issues (e.g. neonatal jaundice)
- I had problems with breastfeeding my infant (e.g. unfavorable nipples)
- I had a lack of knowledge about how to breastfeed correctly
- I was concerned about foreign substances in the breast milk
- I wanted the possibility to smoke / drink again
- I thought bottle feeding is more comfortable / handier
- I did not have enough time / I had too much stress
- I had to / wanted to go to work again
- My infant had problems with suckling / refuse to nurse/breastfeed
- I did not have enough breast milk
- I wanted to have my body back to myself
- I felt uncomfortable / embarrassed while breastfeeding
- Other reasons: \_\_\_\_\_

**Please answer the next question only if you breastfed for less than one week**

**5. What was your reason to quit breastfeeding?** (multiple answers possible)

- I got sick and / or had to take medication
  - My child got health issues (e.g. neonatal jaundice)
  - I had problems with breastfeeding my infant (e.g. mastitis)
  - I was concerned about foreign substances in the breast milk
  - I wanted the possibility to smoke / drink again
  - I thought bottle feeding is more comfortable / handier
  - I did not have enough time / I had too much stress
  - I had to / wanted to go to work again
  - My infant had problems with suckling / refuse to nurse
  - My breast milk supply was not sufficient / my infant did not gain enough weight
  - I wanted to have my body back to myself
  - I felt uncomfortable / embarrassed while breastfeeding
  - I did not feel advised sufficiently / I was to insecure how to breastfeed correctly
  - I thought it was the right time to quit breastfeeding/ For me it was the right time to end breastfeeding
  - Other reasons: \_\_\_\_\_
- 

**6. Since I started the supplementary diet - besides breast milk/ infant formula and water - my child also got the following beverages in the first two years of life:** (multiple answers possible)

- unsweetened tea
- sweetened tea
- fruit juice
- nothing additional to breast milk/baby milk and water
- others: \_\_\_\_\_

**7. When did you implement supplementary diet?**

- I started feeding supplementary diet at the   months
- I used to breastfeed additionally during the start of supplementary diet:
  - Yes  No

**8. Which of the following statements describes your ratio between homemade and store-bought baby food best?**

- I only fed homemade baby food
- I fed homemade baby food mainly (approx. 75% homemade baby food)
- I equally fed breast milk and infant formula (approx. 50% homemade and 50% store-bought baby food)
- I mainly fed store-bought baby food (ca. 75% baby food)
- I only fed store-bought baby food

**9. Did your child get additional „snacks“ (e.g. millet rings, squeeze pouches) in the first two years of life?**

- Yes  No

If yes, what kind of snacks did they get? \_\_\_\_\_

If yes, how often did they get such snacks?

- daily
- 5-6 times per week
- 3-4 times per week
- 1-2 times per week
- rarely / only in special situations

**10. Did you actively change your lifestyle (your nutrition and / or activity) during the first two years after delivery in order to get fitter or reach your desired weight?**

- Yes     No

If yes: what did you change?

- I changed my general nutrition (e.g. started vegetarian / vegan diet)
- I started a diet (especially for weight reduction, e.g. low carb, weight watchers)
- I was more active (e.g. went for a walk more often)
- I was more active and changed my nutrition
- I started a new sport discipline
- others: \_\_\_\_\_

**Thank you for your participation!**
